# Supplementary material for: Incorporation of a [Ru(dcbpy)(bpy)2]2+ photosensitizer and a Pt(dcbpy)Cl2 catalyst into metal–organic frameworks for photocatalytic hydrogen evolution from aqueous solution
Source: Royal Society of Chemistry journal article supplement (doi:10.1039/c5ta01135c), 2015-01-01
Supplement: c5ta01135c1.pdf [file c5ta01135c1.pdf]

## Supporting Information

# **Incorporation of a Molecular $[\text{Ru}(\text{dcbpy})(\text{bpy})_2]^{2+}$ Photosensitizer and a $\text{Pt}(\text{dcbpy})\text{Cl}_2$ Catalyst into Metal-Organic Frameworks for Photocatalytic Hydrogen Evolution from Aqueous Solution**

Chun-Chao Hou, Ting-Ting Li, Shuang Cao, Yong Chen,\* and Wen-Fu Fu

*<sup>a</sup> Key Laboratory of Photochemical Conversion and Optoelectronic Materials and HKU-CAS Joint Laboratory on New Materials, Technical Institute of Physics and Chemistry, University of Chinese Academy of Sciences, Chinese Academy of Sciences, Beijing 100190, P.R. China*

*E-mail: [chenyong@mail.ipc.ac.cn](mailto:chenyong@mail.ipc.ac.cn)*

*<sup>b</sup> College of Chemistry and Engineering, Yunnan Normal University, Kunming 650092, P.R. China*

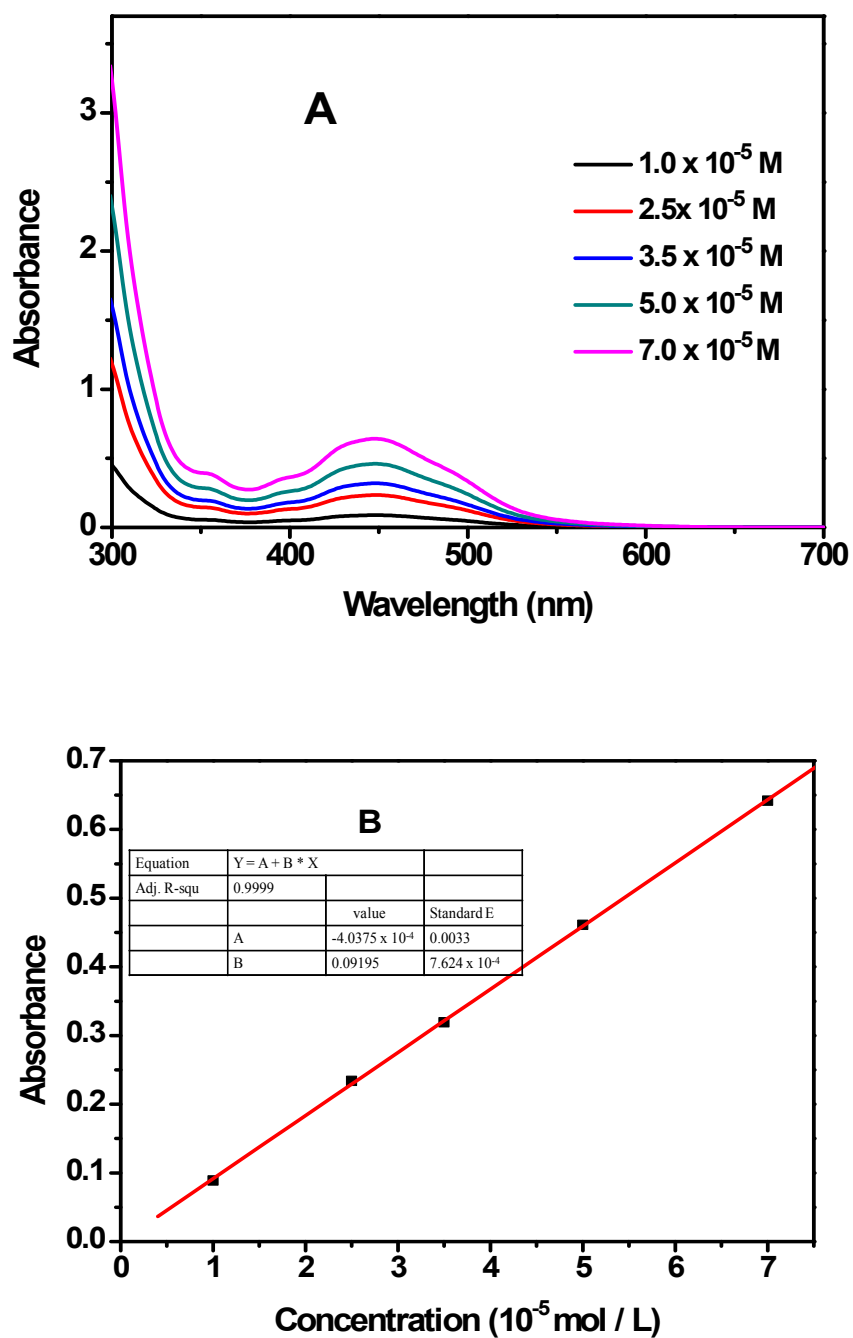

**Figure S1.** (A) The UV-vis absorption spectra of RuDCBPY at various concentrations in aqueous solution. (B) The absorbance of RuDCBPY at 448 nm as a function of concentration.

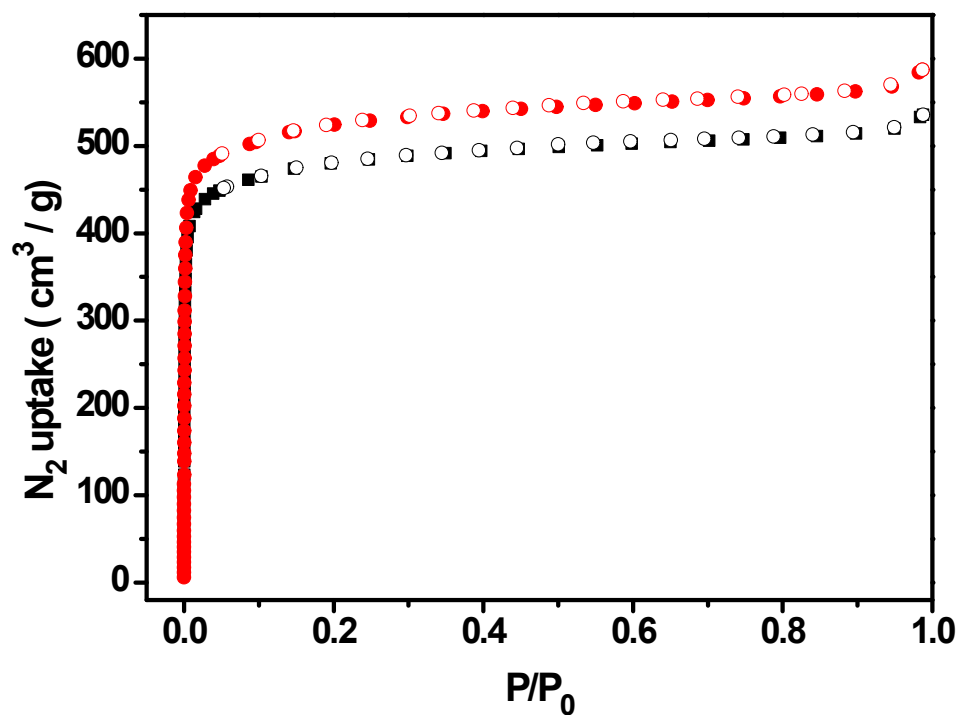

**Figure S2.** N<sub>2</sub> absorption (filled symbols) and desorption (open symbols) isotherms for Pt-UIO-67 (red) and Ru-Pt@UIO-67 (black).

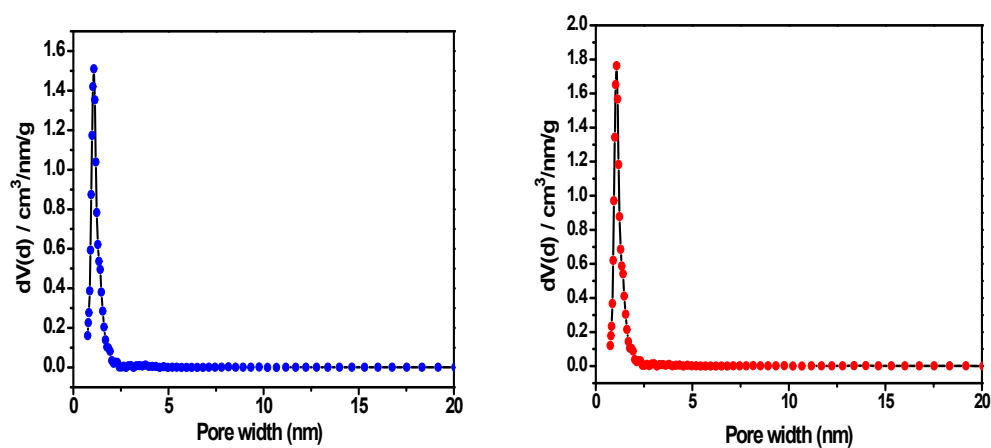

**Figure S3.** Pore size distribution of Pt-UIO-67 (left) and Ru-Pt@UIO-67 (right) obtained from N<sub>2</sub> gas sorption experiments by DFT calculation.

**Table S1.** Surface area, pore volume and main pore size of Pt@UIO-67 and Ru-Pt@UIO-67.

| Samples      | $S_{\text{BET}}$           | Pore volume               | Main Pore Size |
|--------------|----------------------------|---------------------------|----------------|
| UIO-67       | 3000 m <sup>2</sup> /g     | 1.05 cm <sup>3</sup> /g   | 8 Å            |
| Pt@UIO-67    | 2053.713 m <sup>2</sup> /g | 0.9083 cm <sup>3</sup> /g | 8-10 Å         |
| Ru-Pt@UIO-67 | 1886.130 m <sup>2</sup> /g | 0.8286 cm <sup>3</sup> /g | 8-10 Å         |

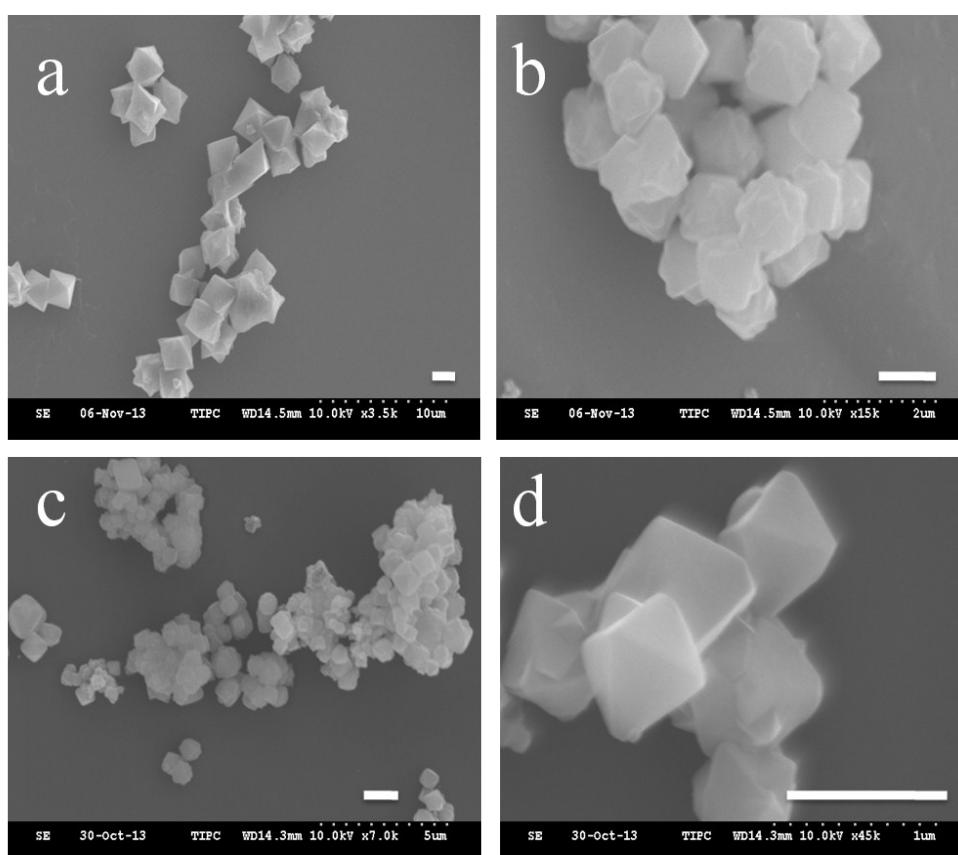

**Figure S4.** SEM images of (a) UIO-67, (b) Pt@UIO-67 and (c,d) Ru-Pt@UIO-67. Scale bar: 1 μm.

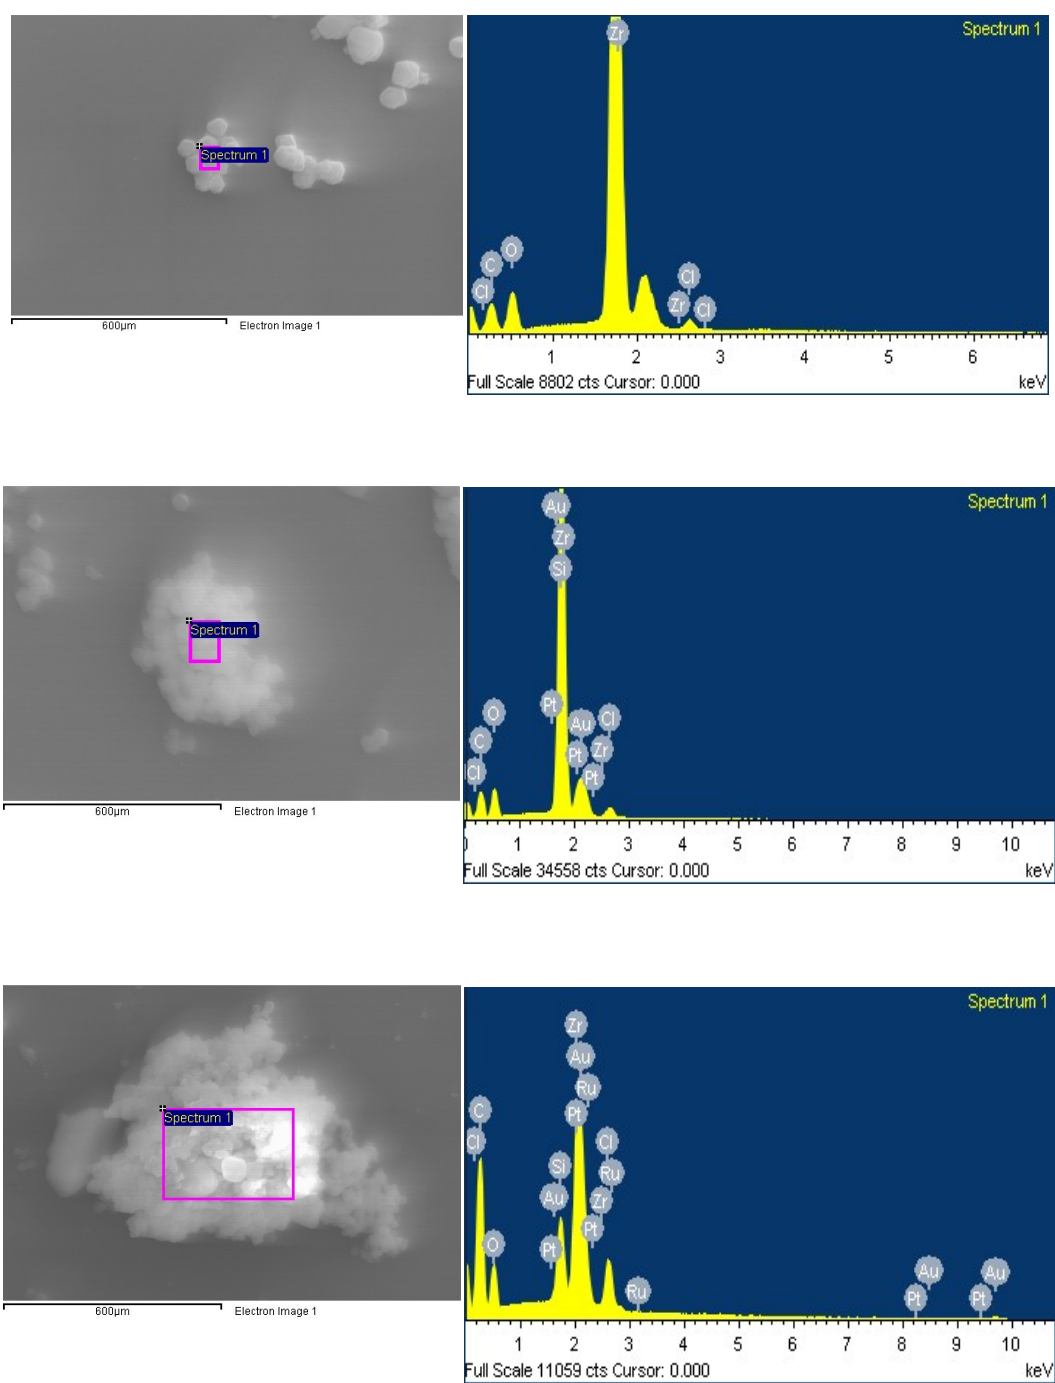

**Figure S5.** SEM-Energy dispersive X-ray (EDX) analysis in random areas of UIO-67, Pt@UIO-67, and Ru-Pt@UIO-67 (from top to bottom).

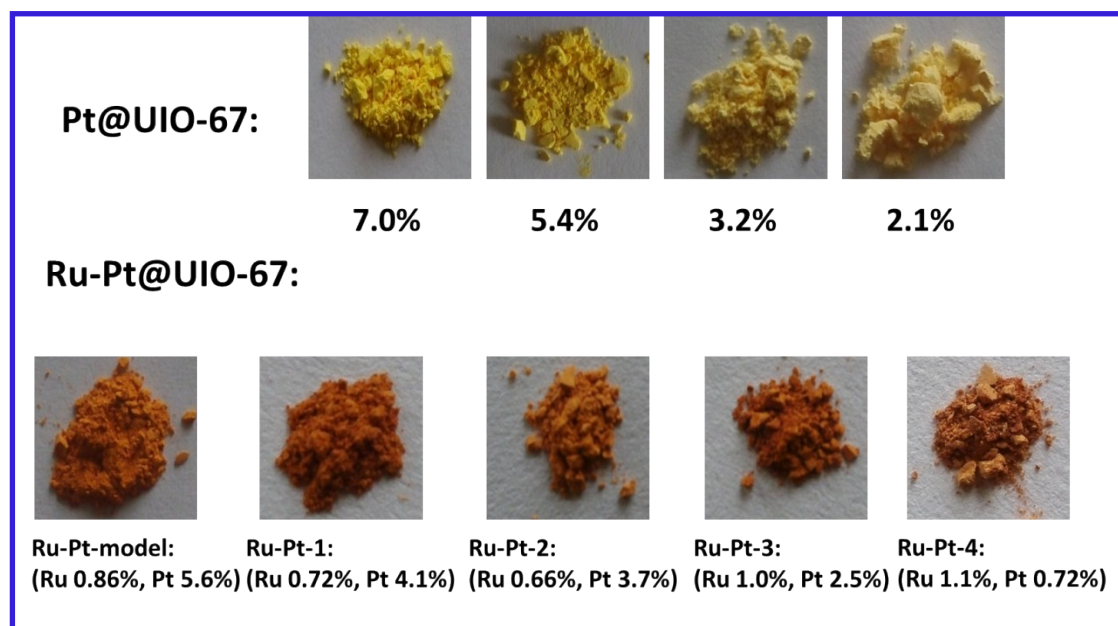

**Figure S6.** Photographs of Pt@UIO-67 and Ru-Pt@UIO-67 MOFs with various doping concentrations under natural light.

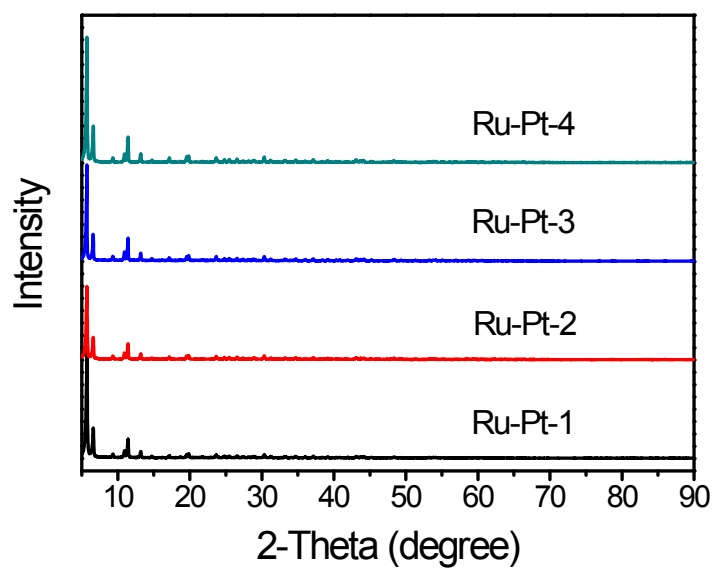

**Figure S7.** The XRD patterns of Ru-Pt@UIO-67 MOFs.

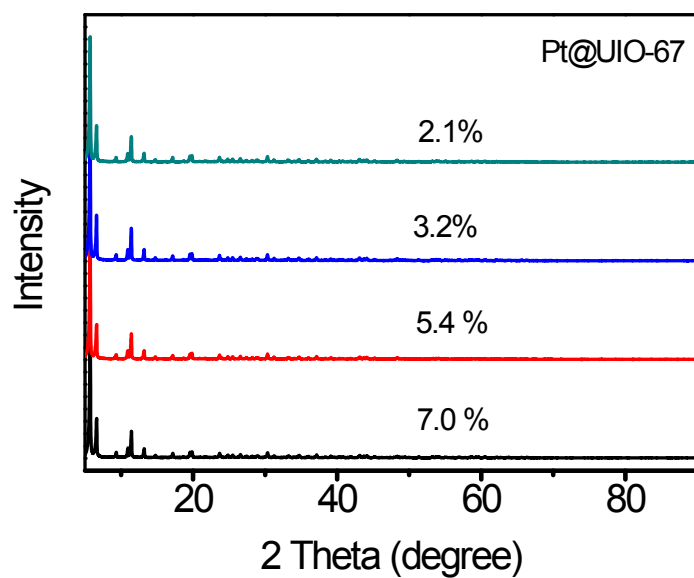

**Figure S8.** The XRD patterns of Pt@UIO-67 MOFs.

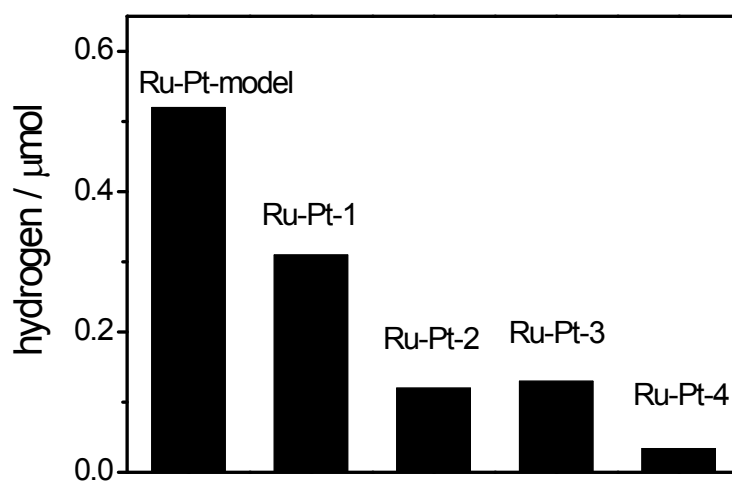

**Figure S9.** Photocatalytic hydrogen production after 5 h of irradiation from an acetate buffer solution (pH = 5.0) of EDTA-2Na and Ru-Pt@UIO-67 (5 mg). Light source: LED  $\lambda > 420$  nm,  $30 \times 1$  W.

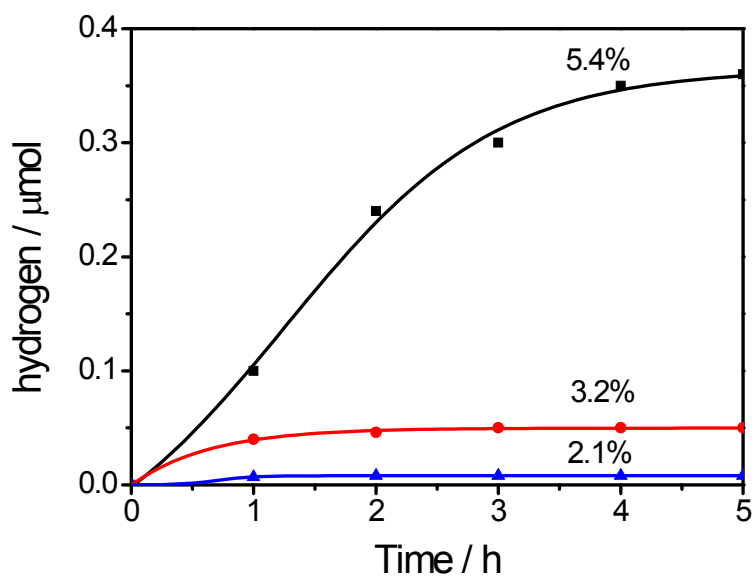

**Figure S10.** Photocatalytic hydrogen production from an acetate buffer solution (pH = 5.0) of EDTA-2Na and Pt@UIO-67 ( $\sim 1.47 \mu\text{mol Pt}$ ). Light source: LED  $\lambda > 420 \text{ nm}$ ,  $30 \times 1 \text{ W}$ .

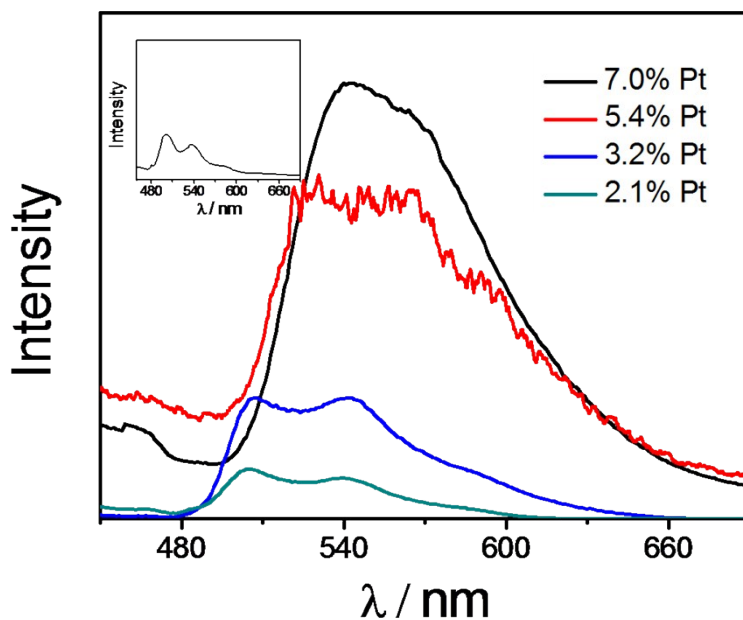

**Figure S11.** Emission spectra of Pt@UIO-67 MOFs with various doping concentrations at 77 K ( $\lambda_{\text{ex}} = 365 \text{ nm}$ ). Inset: The emission spectrum of Pt(dcbpy)Cl<sub>2</sub> in glassy MeOH/EtOH (1:4) solution at 77 K ( $\lambda_{\text{ex}} = 365 \text{ nm}$ ).

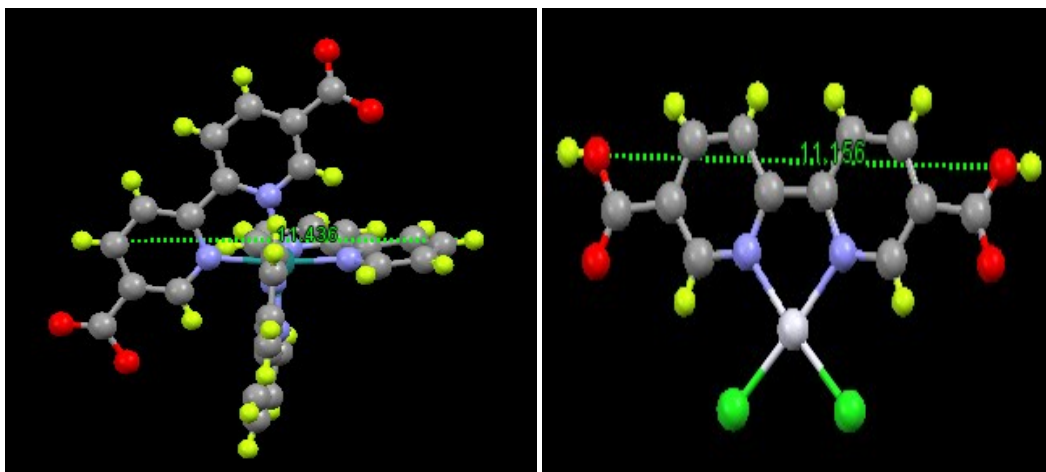

**Figure S12.** The diameters of RuDCBPY and PtDCBPY molecules.

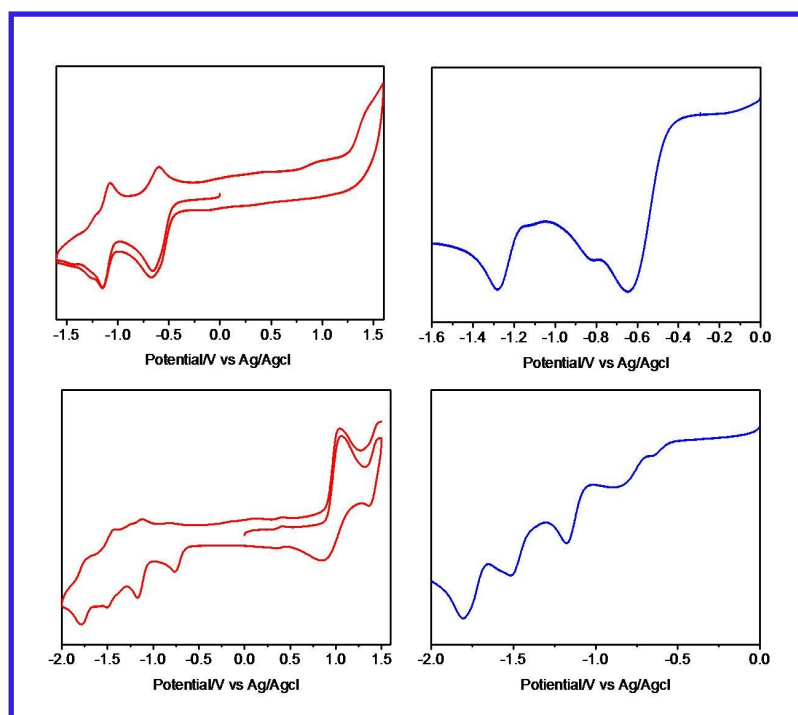

**Figure S13.** The cyclic voltammograms (CV) and linear sweep voltammograms (LSV) of 0.1 mM PtDCBPY (top) and 0.1 mM RuDCBPY (bottom) in DMF solution.

**Table S2.** Spectral data and electrochemical potentials ( $E_{1/2}$  vs Ag/AgCl)<sup>a</sup> of RuDCBPY and PtDCBPY.

| Compound | $\lambda_{\text{max}}$ (nm) |     | $\lambda_{\text{em}}$ (nm) |     | $E_{1/2}^{\text{ox}}(\Delta E)$ | $E_{1/2}^{\text{red}}(\Delta E)$ |
|----------|-----------------------------|-----|----------------------------|-----|---------------------------------|----------------------------------|
|          | H <sub>2</sub> O            | DMF | H <sub>2</sub> O           | DMF |                                 |                                  |
| Ru-DCBPY | 448                         | 462 | 650                        | 625 | 0.97(169)                       | -1.19(42), -1.46(75), -1.77(66)  |
| Pt-DCBPY | 415                         |     |                            |     | 1.13 <sup>ir</sup>              | -1.25(34), -0.65(37)             |

<sup>a</sup> Measured with a glassy carbon working electrode, a Ag/AgCl reference electrode, and a platinum plate counter electrode in DMF solution containing <sup>n</sup>Bu<sub>4</sub>NPF<sub>6</sub> (0.1 M) at a scan rate of 100 mV/s; ir = irreversible.  $E_{1/2} = (E_{\text{pa}} + E_{\text{pc}})/2$  in volts, and  $\Delta E = E_{\text{pa}} - E_{\text{pc}}$  in mV.

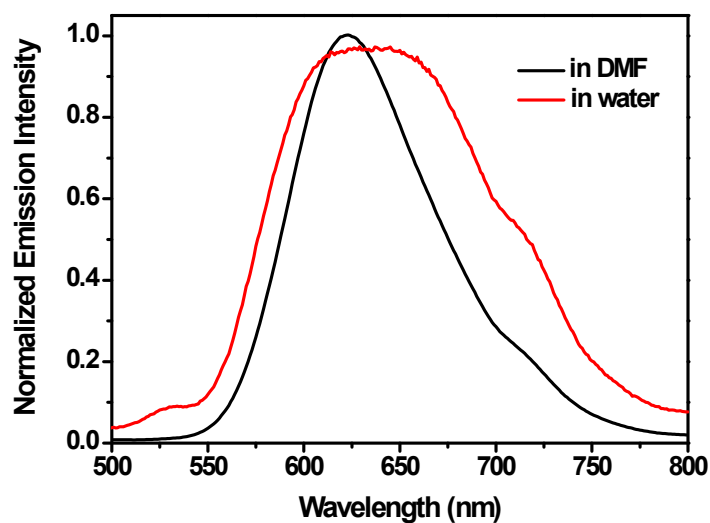

**Figure S14.** The emission spectra of RuDCBPY in DMF and in water.

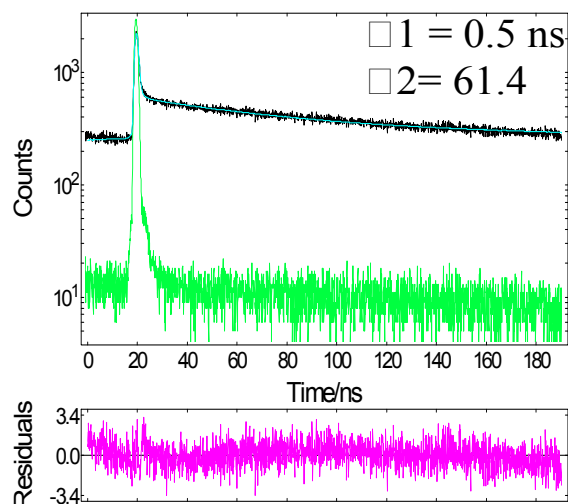

**Figure S15.** Emission lifetime decays obtained at room temperature for Ru-Pt@UIO-67.

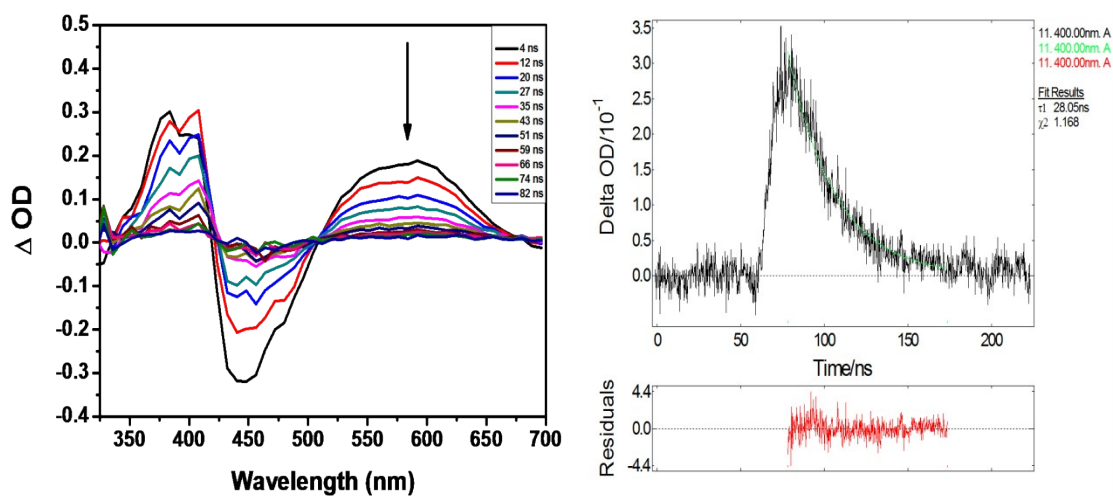

**Figure S16.** The nanosecond transient absorption spectra and the corresponding nanosecond recovery kinetics of transient bleaching recovery (monitored at 400 nm upon laser excitation at 355 nm) for EDTA-2Na (30 mM) +  $[\text{Ru}(\text{dcbpy})(\text{bpy})_2]^{2+}$  ( $1.5 \times 10^{-4}$  M) in pH 5.0 solution.

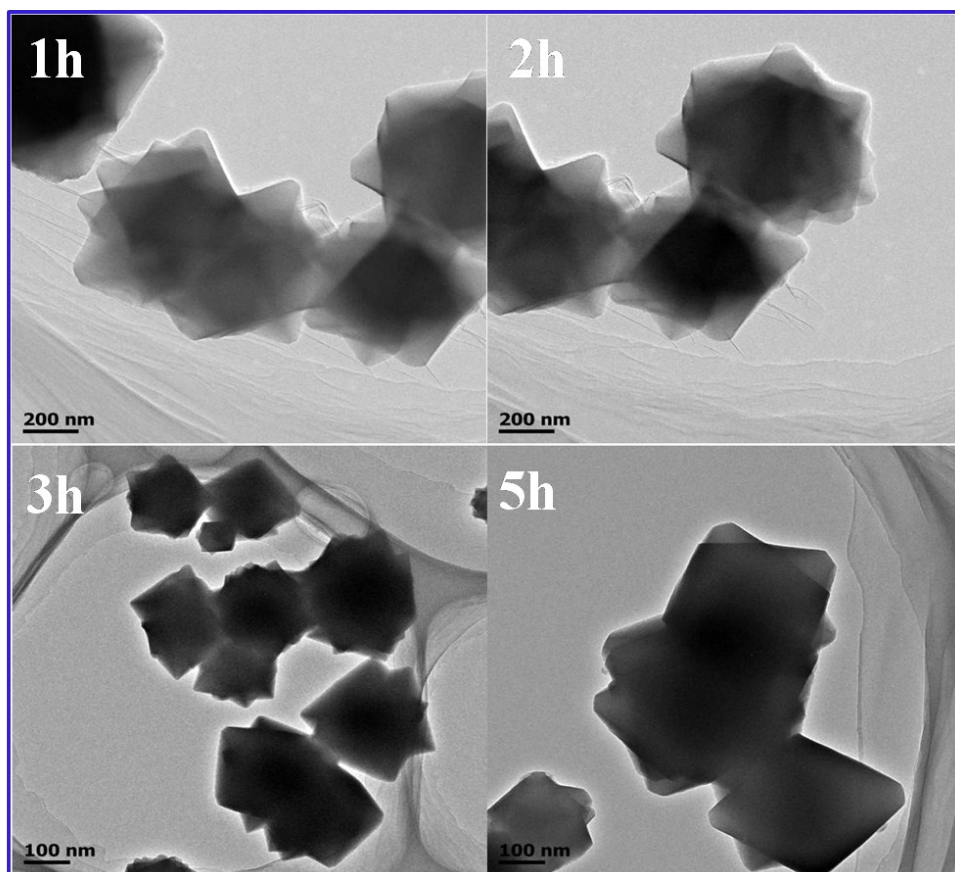

**Figure S17.** TEM images of Ru-Pt@UIO-67 obtained at different reaction time.

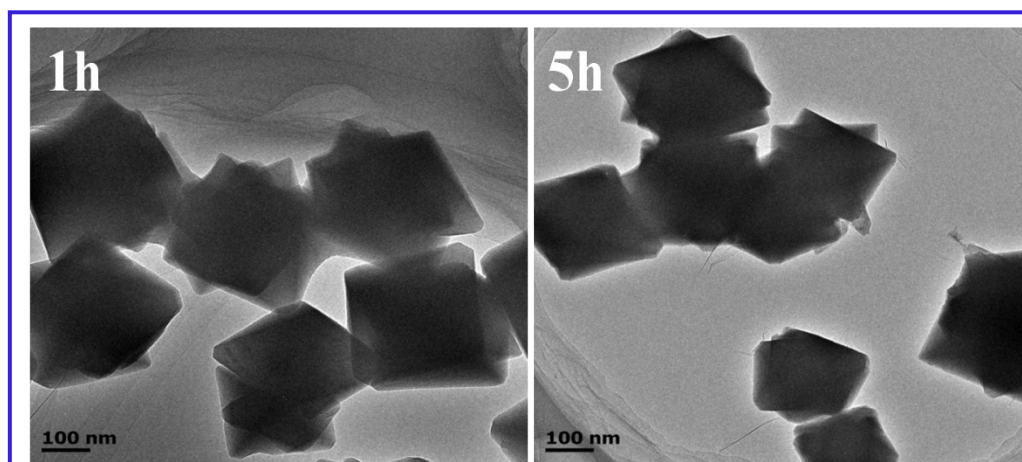

**Figure S18.** TEM images of Pt@UIO-67 obtained at different reaction time.
